# Supplementary material for: The Phenotypic Spectrum of COL4A3 Heterozygotes
Source: PubMed Central journal article supplement — Kidney Int Rep. 2023 Jul 25;8(10):2088–99. doi: 10.1016/j.ekir.2023.07.010 (PMC10577321; doi:10.1016/j.ekir.2023.07.010), 2023-07-25
Supplement: mmc1.pdf [file mmc1.pdf]

## **Supplemental Materials**

### **Supplemental Methods.**

**Supplemental Table 1. Coding definitions for comorbidities**

**Supplemental Table 2. Characteristics by individual variants**

**Supplemental Table 3. Characteristics of COL4A3 P/LP Heterozygotes and non-heterozygotes before and after matching**

**Supplemental Table 4. COL4A3 P/LP heterozygotes with an additional rare variant in COL4A3/4/5**

**Supplemental Table 5. Chart Review data of COL4A3 AD Alport Syndrome-related Diagnosis and Management**

**Supplemental Figure 1. KDIGO Risk Categories by COL4A3 P/LP Variant Group and Controls**

**Supplemental Figure 2. KDIGO Risk Categories in Glycine collagenous domain variants vs. controls, by age group**

**STROBE Statement**

### Supplemental Methods.

Sequencing was performed by paired end 75bp reads on either an Illumina HiSeq2500 or NovaSeq. Coverage depth was sufficient to provide more than 20% coverage over 85% of the targeted bases in 96% of the VCR samples and 90% coverage for 99% of IDT samples. Alignments and variant calling were based on GRCh38 human genome reference sequence. We required AD\_ALT>3 and balance AD\_ALT/AD\_REF ≥0.5.

**Supplemental Table 1. Coding definitions for comorbidities**

| Comorbidities              | Codes                                                                                                                                                                                                                         |
|----------------------------|-------------------------------------------------------------------------------------------------------------------------------------------------------------------------------------------------------------------------------|
| Hematuria                  | ICD-10: R31.0, R31.1, R31.21, R31.29, R31.9; ICD-9: 599.7*                                                                                                                                                                    |
| FSGS                       | ICD-10: N03.1, N04.1, N05.1, N06.1; ICD-9: 581.1                                                                                                                                                                              |
| Alport Syndrome            | ICD-10: Q87.81                                                                                                                                                                                                                |
| Sensorineural hearing loss | ICD-10: H90.3; ICD-9: 389.11, 389.12, 389.14, 389.18                                                                                                                                                                          |
| ESKD                       | Dialysis ICD codes 39.27, 39.42, 39.53, 39.54, 585.6, V45.11, V45.12, V56.1, V56.2, V56.31, V56.32, V56.8, V45.1, N18.6, Z91.15, N18.5+Z99.2<br>Transplant ICD codes 00.91, 00.92, 00.93, 55.53, 55.69, V42.0, OTY****, Z94.0 |
| Hypertension               | ICD-9: 401 - 405<br>ICD-10: I10 - I16                                                                                                                                                                                         |
| Diabetes mellitus          | ICD-9: 250*<br>ICD-10: E10, E11, E13                                                                                                                                                                                          |

**Supplemental Table 2. Characteristics by individual variants**

| Variant                                                                            | ClinVar (as of 2/23/23)                                                                          | Varsome ACMG Classifier (as of 2/23/23) | Age            | Hematuria ICD code | Hearing loss ICD code | eGFR <60 | eGFR <30 | ESKD ICD code | UA available | Trace blood on 50% | 1+ blood on 50% |
|------------------------------------------------------------------------------------|--------------------------------------------------------------------------------------------------|-----------------------------------------|----------------|--------------------|-----------------------|----------|----------|---------------|--------------|--------------------|-----------------|
| <b>rs1014839148 (n = 2)</b><br>2:227248494:G:A<br>c.520G>A<br>p.Gly174Arg          | Conflicting (1 pathogenic, 1 likely pathogenic, 2 uncertain significance); 4 submissions; 1 star | Likely pathogenic (9 points)            | 80.7 (SD 13.8) | 50%                | 50%                   | 50%      | 0        | 0             | 100%         | 100%               | 100%            |
| <b>rs1057516204 (n=1)</b><br>2:227293218:GGAAA:G<br>c.3244_3247del<br>p.Lys1082fs  | Pathogenic; 2 submissions; 1 star                                                                | Pathogenic (10 points)                  | 74.2           | 0%                 | 0                     | 100%     | 0        | 0             | 100%         | 0                  | 0               |
| <b>rs1064796094 (n=2)</b><br>2:227290085:CCA:C<br>c.3068_3069del<br>p.Pro1023fs    | Pathogenic/Likely pathogenic; 3 submissions; 2 stars                                             | Pathogenic (17 points)                  | 54 (SD 18.4)   | 50%                | 0                     | 0        | 0        | 0             | 100%         | 100%               | 50%             |
| <b>rs1158937060 (n=5)</b><br>2:227273119:T:C<br>c.1927+2T>C                        | Likely pathogenic; 2 submissions; 2 stars                                                        | Pathogenic (11 points)                  | 55.6 (SD 21.2) | 0                  | 0                     | 33.30%   | 0        | 0             | 100%         | 0                  | 0               |
| <b>rs1167411352 (n=1)</b><br>2:227297727:G:C<br>c.3619G>C<br>Gly1207Arg            | Pathogenic; 1 submission; 1 star                                                                 | Pathogenic (16 points)                  | 48.8           | 0                  | 0                     | 0        | 0        | 0             | 100%         | 100%               | 0               |
| <b>rs1173685095 (n=9)</b><br>2:227290090:T:C<br>c.3070+2T>C                        | Likely pathogenic; 1 submission; 0 stars                                                         | Pathogenic (10 points)                  | 60.0 (SD 21.2) | 33.30%             | 0                     | 37.50%   | 25%      | 22.20%        | 77.80%       | 85.70%             | 71.40%          |
| <b>rs1175052474 (n=12)</b><br>2:227295295:A:AGAG<br>c.3546_3548dup<br>p.Gly1183dup | Conflicting (2 pathogenic, 2 likely pathogenic, 2 uncertain significance); 9 submissions; 1 star | Likely pathogenic (6 points)            | 65.8 (SD 12.4) | 50%                | 0.00%                 | 50%      | 8.30%    | 0.00%         | 83.30%       | 90%                | 70%             |
| <b>rs1192750535 (n=1)</b><br>2:227293230:G:T<br>c.3250G>T<br>p.Glu1084Ter          | Pathogenic; 2 submissions; 2 stars                                                               | Pathogenic (13 points)                  | 39.5           | 0                  | 0                     | 0        | 0        | 0             | 100%         | 100%               | 0               |
| <b>rs1196996393 (n=1)</b><br>2:227284210:G:C<br>c.2747-1G>C                        | Pathogenic; 2 submissions; 2 stars                                                               | Pathogenic (13 points)                  | 73.6           | 0.0%               | 0.0%                  | 0.0%     | 0.0%     | 0.0%          | 0.0%         | N/A                | N/A             |
| <b>rs756539994 (n=21)</b><br>2:227293286:CCCTGGAAGT:C<br>c.3312_3329del            | Conflicting (2 pathogenic, 1 likely pathogenic, 3 uncertain significance); 4 submissions; 1 star | Likely pathogenic (6 points)            | 56.3 (SD 15.7) | 14.3%              | 14.3%                 | 10.5%    | 5.3%     | 0.0%          | 76.2%        | 18.8%              | 18.8%           |
| <b>rs759043857 (n=20)</b><br>2:227282495:AG:A<br>c.2621del<br>p.Gly874fs           | Likely pathogenic; 3 submissions; 2 stars                                                        | Pathogenic (17 points)                  | 57.6 (SD 20.6) | 15.0%              | 10.0%                 | 23.5%    | 0.0%     | 0.0%          | 65.0%        | 7.7%               | 7.7%            |
| <b>rs760462252 (n=39)</b><br>2:227307839:C:T<br>c.4382C>T<br>p.Pro1461Leu          | Pathogenic; 1 submission; 1 star                                                                 | Uncertain significance (5 points)       | 56.6 (SD 20.5) | 10.3%              | 15.4%                 | 19.4%    | 2.8%     | 2.6%          | 84.6%        | 12.1%              | 9.1%            |
| <b>rs760846085 (n=32)</b><br>2:227310822:CT:C<br>c.4803del<br>p.Gly1602fs          | Pathogenic/likely pathogenic; 4 submissions; 2 stars                                             | Pathogenic (17 points)                  | 61.6 (SD 17.7) | 12.5%              | 0.0%                  | 25.0%    | 7.1%     | 6.3%          | 87.5%        | 28.6%              | 17.9%           |
| <b>rs868002181 (n=10)</b><br>2:227280970:G:A<br>c.2452G>A<br>p.Gly818Arg           | Conflicting (2 pathogenic, 1 likely pathogenic, 1 uncertain significance); 6 submissions; 1 star | Likely pathogenic (7 points)            | 63.0 (SD 14.0) | 30.0%              | 0.0%                  | 30.0%    | 20.0%    | 0.0%          | 90.0%        | 62.5%              | 50.0%           |
| <b>rs200287952 (n=161)</b><br>2:227277511:G:A<br>2083G>A<br>Gly695Arg              | Pathogenic; 3 submissions; 1 star                                                                | Likely pathogenic (8 points)            | 59.4 (SD 19.1) | 35.4%              | 4.4%                  | 31.7%    | 12.4%    | 8.1%          | 79.5%        | 70.3%              | 55.5%           |
| <b>rs121912824 (n=3)</b><br>2:227307897:C:T<br>c.4441C>T<br>p.Arg1481Ter           | Pathogenic; 7 submissions; 2 stars                                                               | Pathogenic (17 points)                  | 56.5 (SD 28.4) | 0.0%               | 0.0%                  | 0.0%     | 0.0%     | 0.0%          | 66.6%        | 0.0%               | 0.0%            |
| <b>rs1306992119 (n=1)</b><br>2:227280529:ACTCCCTGGACTTCCAGGT:A<br>c.2323_2340del   | Pathogenic/Likely pathogenic; 3 submissions; 2 stars                                             | Likely pathogenic (7 points)            | 51.5           | 0.0%               | 0.0%                  | 0.0%     | 0.0%     | 0.0%          | 66.7%        | 0.0%               | 0.0%            |
| <b>rs1445615417 (n=2)</b><br>2:227307867:GTTTC:G<br>c.4420_4424del<br>p.Leu1474fs  | Pathogenic; 4 submissions; 2 stars                                                               | Pathogenic (17 points)                  | 52.0 (SD 22.3) | 50.0%              | 0.0%                  | 0.0%     | 0.0%     | 0.0%          | 100.0%       | 0.0%               | 0.0%            |
| <b>rs1453590085 (n=1)</b><br>2:227164754:C:T<br>c.28C>T<br>p.Gln10Ter              | Pathogenic; 2 submissions; 2 stars                                                               | Pathogenic (13 points)                  | 39             | 0.0%               | 0.0%                  | 0.0%     | 0.0%     | 0.0%          | 0.0%         | N/A                | N/A             |
| <b>rs1469479748 (n=1)</b><br>2:227253310:AAG:A<br>c.663_664del<br>p.Arg221fs       | Pathogenic/likely pathogenic; 4 submissions; 2 stars                                             | Pathogenic (17 points)                  | 64.9           | 0.0%               | 0.0%                  | 0.0%     | 0.0%     | 0.0%          | 100.0%       | 0.0%               | 0.0%            |
| <b>rs1553751120 (n=1)</b><br>2:227247583:AG:A<br>c.468+1del                        | Likely pathogenic; 1 submission; 1 star                                                          | Pathogenic (11 points)                  | 62.2           | 0.0%               | 0.0%                  | 0.0%     | 0.0%     | 0.0%          | 0.0%         | N/A                | N/A             |
| <b>rs1553751122 (n=5)</b><br>2:227247585:G:T c.468+1G>T                            | Likely pathogenic; 1 submission; 1 star                                                          | Pathogenic (11 points)                  | 60.8 (SD 20.0) | 20.0%              | 0.0%                  | 60.0%    | 20.0%    | 0.0%          | 80.0%        | 75.0%              | 25.0%           |
| <b>rs1553766404 (n=3)</b><br>2:227309077:G:T<br>c.4640+1G>A                        | Likely pathogenic; 1 submission; 1 star                                                          | Pathogenic (11 points)                  | 53.5 (SD 17.5) | 33.3%              | 0.0%                  | 33.3%    | 0.0%     | 0.0%          | 100.0%       | 0.0%               | 0.0%            |

|                                                                                     |                                                                                                  |                                   |                 |              |       |        |       |        |        |        |        |
|-------------------------------------------------------------------------------------|--------------------------------------------------------------------------------------------------|-----------------------------------|-----------------|--------------|-------|--------|-------|--------|--------|--------|--------|
| <b>rs1559854632 (n=2)</b><br>2: 227237968<br>c.88G>C<br>Gly30Arg                    | Likely pathogenic; 1 submission; 0 stars                                                         | Uncertain significance (2 points) | 62.3 (SD 16.3)  | 50.0%        | 0.0%  | 50.0%  | 0.0%  | 0.0%   | 100.0% | 50.0%  | 0.0%   |
| <b>rs1559873550 (n=1)</b><br>2: 227257621:G:T<br>c.1006G>T<br>p.Gly336Cys           | Pathogenic/likely pathogenic; 4 submissions; 2 stars                                             | Pathogenic (14 points)            | 55.3            | 0.0%         | 0.0%  | 100.0% | 0.0%  | 100.0% | 100.0% | 100.0% | 100.0% |
| <b>rs1559878824 (n=2)</b><br>2: 227263830:G:A<br>c.1201G>A<br>p.Gly401Arg           | Conflicting (1 likely pathogenic, 1 uncertain significance); 3 submissions; 1 star               | Likely pathogenic (6 points)      | 55.7 (SD 9.0)   | 50.0%        | 50.0% | 50.0%  | 0.0%  | 0.0%   | 100.0% | 50.0%  | 50.0%  |
| <b>rs1559897288 (n=2)</b><br>2: 227282523:G:A<br>c.2647G>A<br>p.Gly883Arg           | Likely pathogenic; 1 submission; 0 stars                                                         | Likely pathogenic (7 points)      | 45.4 (SD 1.5)   | 100.0%       | 50.0% | 0.0%   | 0.0%  | 0.0%   | 100.0% | 100.0% | 100.0% |
| <b>rs1574658390 (n=2)</b><br>2: 227240203:G:T<br>c.205G>T<br>p.Glu69Ter             | Likely pathogenic; 1 submission; 0 stars                                                         | Pathogenic (10 points)            | 78.9 (SD 15.5)  | 100.0%       | 0.0%  | 100.0% | 0.0%  | 0.0%   | 50.0%  | 100.0% | 0.0%   |
| <b>rs200672668 (n=2)</b><br>2: 227273108:G:A<br>c.1918G>A<br>p.Gly640Arg            | Pathogenic/likely pathogenic; 6 submissions; 2 stars                                             | Pathogenic (18 points)            | 49.0 (SD 19.4)  | 50.0%        | 0.0%  | 0.0%   | 0.0%  | 0.0%   | 50.0%  | 100.0% | 0.0%   |
| <b>rs202147112 (n=4)</b><br>2: 227245972:G:A<br>c.343G>A<br>p.Gly115Arg             | Conflicting (2 likely pathogenic, 1 uncertain significance); 4 submissions; 1 star               | Likely pathogenic (8 points)      | 44.8 (SD 12.02) | 0.0%         | 0.0%  | 0.0%   | 0.0%  | 0.0%   | 100.0% | 25.0%  | 25.0%  |
| <b>rs267606745 (n=3)</b><br>2: 227295044:G:A<br>c.3499G>A<br>p.Gly1167Arg           | Pathogenic; 6 submissions; 2 stars                                                               | Pathogenic (20 points)            | 44.1 (SD 15.1)  | 100.0%       | 0.0%  | 50.0%  | 0.0%  | 0.0%   | 100.0% | 100.0% | 100.0% |
| <b>rs368434069 (n=4)</b><br>2: 227297751:C:T<br>c.3643C>T<br>p.Arg1215Ter           | Pathogenic; 3 submissions; 2 stars                                                               | Pathogenic (17 points)            | 41.3 (SD 18.3)  | <u>50.0%</u> | 0.0%  | 0.0%   | 0.0%  | 0.0%   | 100.0% | 0.0%   | 0.0%   |
| <b>rs371334239 (n=5)</b><br>2:227263845:C:T<br>c.1216C>T<br>p.Arg406Ter             | Pathogenic; 6 submissions; 2 stars                                                               | Likely benign (-4 points)         | 48.9 (SD 23.1)  | 20.0%        | 0.0%  | 0.0%   | 0.0%  | 0.0%   | 100.0% | 60.0%  | 20.0%  |
| <b>rs375040636 (n=1)</b><br>2: 227279882:G:A<br>c.2215G>A<br>p.Gly739Arg            | Likely pathogenic; 3 submissions; 2 stars                                                        | Pathogenic (20 points)            | 72.5            | 0.0%         | 0.0%  | 100.0% | 0.0%  | 0.0%   | 100.0% | 100.0% | 100.0% |
| <b>rs73527081 (n=6)</b><br>2: 227253637:C:T<br>764C>T<br>Thr255Met                  | Conflicting (1 likely pathogenic; 2 uncertain significance); 4 submissions; 1 star               | Uncertain significance (2 points) | 63.4 (SD 28.2)  | 0.0%         | 16.7% | 0.0%   | 0.0%  | 0.0%   | 66.7%  | 0.0%   | 0.0%   |
| <b>rs748026887 (n=2)</b><br>2:227307800:TCACCCGA:T<br>c.4347_4353del<br>p.Arg1450fs | Pathogenic; 5 submissions; 2 stars                                                               | Pathogenic (17 points)            | 73.3 (SD 15.9)  | 0.0%         | 0.0%  | 0.0%   | 0.0%  | 0.0%   | 50.0%  | 0.0%   | 0.0%   |
| <b>rs766208466 (n=6)</b><br>2: 227310803:G:A<br>c.4783G>A<br>p.Gly1595Arg           | Conflicting (1 likely pathogenic, 1 uncertain significance); 3 submissions; 1 star               | Uncertain significance (5 points) | 57.6 (SD 15.9)  | 0.0%         | 0.0%  | 20.0%  | 0.0%  | 0.0%   | 83.3%  | 0.0%   | 0.0%   |
| <b>rs766306957 (n=8)</b><br>2:227284229:GAGTAAAGGGCC:G<br>c.2768_2778del            | Pathogenic; 6 submissions; 2 stars                                                               | Pathogenic (17 points)            | 65.5 (SD 16.4)  | 37.5%        | 0.0%  | 0.0%   | 0.0%  | 0.0%   | 100.0% | 12.5%  | 12.5%  |
| <b>rs766909945 (n=2)</b><br>2:227290785:C:T<br>c.3109C>T<br>p.Arg1037Ter            | Pathogenic; 5 stars; 2 stars                                                                     | Likely benign (-2 points)         | 81.2 (SD 13.2)  | 50.0%        | 0.0%  | 50.0%  | 50.0% | 0.0%   | 100.0% | 50.0%  | 0.0%   |
| <b>rs769683665 (n=3)</b><br>2:227289230:G:A<br>c.2962G>A<br>p.Gly988Arg             | Likely pathogenic; 1 submission; 0 stars                                                         | Pathogenic (10 points)            | 79.4 (SD 9.8)   | 33.3%        | 0.0%  | 33.3%  | 0.0%  | 0.0%   | 66.7%  | 0.0%   | 0.0%   |
| <b>rs769863513 (n=4)</b><br>2:227308922:C:T<br>c.4486C>T<br>p.Arg1496Ter            | Pathogenic/likely pathogenic; 4 submissions; 2 stars                                             | Pathogenic (17 points)            | 61.3 (SD 14.8)  | 0.0%         | 25.0% | 0.0%   | 0.0%  | 0.0%   | 50.0%  | 0.0%   | 0.0%   |
| <b>rs779575469 (n=1)</b><br>2:227270788:G:T<br>c.1594G>T<br>p.Gly532Cys             | Pathogenic; 2 submissions; 1 star                                                                | Pathogenic (14 points)            | 51.8            | 0.0%         | 0.0%  | 0.0%   | 0.0%  | 0.0%   | 100.0% | 100.0% | 100.0% |
| <b>rs867868993 (n=1)</b><br>2:227310818:CCCC:CCC<br>c.4802del<br>p.Pro1601fs        | Pathogenic/Likely pathogenic; 2 submissions; 2 stars                                             | Pathogenic (11 points)            | 75.4            | 0.0%         | 0.0%  | 0.0%   | 0.0%  | 0.0%   | 100.0% | 0.0%   | 0.0%   |
| <b>rs914878176 (n=3)</b><br>2:227295016:G:C<br>c.3472G>C<br>p.Gly1158Arg            | Conflicting (1 pathogenic, 2 likely pathogenic, 1 uncertain significance); 5 submissions; 1 star | Likely pathogenic (7 points)      | 43.3 (SD 5.5)   | 33.3%        | 0.0%  | 0.0%   | 0.0%  | 0.0%   | 100.0% | 100.0% | 66.7%  |
| <b>rs988439345 (n=2)</b><br>2:227253581:AC:A<br>c.713del<br>p.Pro240fs              | Pathogenic; 1 submission; 1 star                                                                 | Pathogenic (11 points)            | 69.5 (SD 8.3)   | 0.0%         | 0.0%  | 100.0% | 0.0%  | 0.0%   | 100.0% | 50.0%  | 50.0%  |
| <b>rs993103826 (n=2)</b><br>2:227282410:GC:G<br>c.2535del<br>p.Leu846fs             | Pathogenic/Likely pathogenic; 3 submissions; 2 stars                                             | Pathogenic (17 points)            | 39.1 (SD 6.3)   | 0.0%         | 0.0%  | 0.0%   | 0.0%  | 0.0%   | 100.0% | 50.0%  | 50.0%  |

**Supplemental Table 3. Characteristics of COL4A3 P/LP Heterozygotes and non-heterozygotes before and after matching**

|                                              | Before matching (N=174361)*       |                              |         |       | After propensity score matching (N=2411) |                            |         |        |
|----------------------------------------------|-----------------------------------|------------------------------|---------|-------|------------------------------------------|----------------------------|---------|--------|
|                                              | COL4A3 P/LP heterozygotes (n=402) | Non-heterozygotes (n=173959) | P value | SMD   | COL4A3 P/LP heterozygotes (n=402)        | Non-heterozygotes (n=2009) | P value | SMD    |
| Age, Mean (SD)                               | 59.0 (18.6)                       | 57.5 (18.9)                  | 0.104   | 0.082 | 59.1 (18.7)                              | 59.1 (18.5)                | 0.986   | 0.001  |
| Female (%)                                   | 257 (63.9)                        | 105441 (60.6)                | 0.19    | 0.069 | 257 (63.9)                               | 1284 (63.9)                | 1       | <0.001 |
| Black, n (%)                                 | 9 (2.2)                           | 3951 (2.3)                   | 1       | 0.002 | 9 (2.2)                                  | 32 (1.6)                   | 0.482   | 0.047  |
| Hispanic, n (%)                              | 4 (1.0)                           | 4613 (2.7)                   | 0.056   | 0.124 | 4 (1.0)                                  | 47 (2.3)                   | 0.128   | 0.105  |
| Year of first outpatient visit, median (IQR) | 2003 (2001-2011)                  | 2004 (2001-2011)             | 0.12    | 0.079 | 2003 (2001-2011)                         | 2003 (2001-2011)           | 0.939   | 0.004  |
| Hypertension (%)                             | 226 (56.2)                        | 92964 (53.3)                 | 0.259   | 0.059 | 226 (56.2)                               | 1129 (56.2)                | 1       | <0.001 |
| Diabetes (%)                                 | 90 (22.4)                         | 41056 (23.6)                 | 0.608   | 0.029 | 90 (22.4)                                | 449 (22.3)                 | 1       | 0.001  |
| Nephrolithiasis (%)                          | 22 (5.5)                          | 10155 (5.8)                  | 0.838   | 0.016 | 22 (5.5)                                 | 109 (5.4)                  | 1       | 0.002  |
| Hematuria, n (%)                             | 110 (27.4)                        | 23404 (13.5)                 | <0.001  | 0.35  | 110 (27.4)                               | 279 (13.9)                 | <0.001  | 0.338  |
| FSGS, n (%)                                  | 7 (1.7)                           | 437 (0.3)                    | <0.001  | 0.15  | 7 (1.7)                                  | 4 (0.2)                    | <0.001  | 0.158  |
| Bilateral sensorineural hearing loss, n (%)  | 23 (5.7)                          | 8340 (4.8)                   | 0.453   | 0.042 | 23 (5.7)                                 | 109 (5.4)                  | 0.906   | 0.013  |
| eGFR available, n (%)                        | 358 (89.1)                        | 154420 (88.8)                | 0.918   | 0.009 | 358 (89.1)                               | 1815 (90.3)                | 0.484   | 0.042  |
| eGFR mean (SD)                               | 74.9 (28.8)                       | 80.9 (26.6)                  | <0.001  | 0.214 | 74.9 (28.8)                              | 80.3 (27.1)                | 0.001   | 0.192  |
| eGFR <60, n (%)                              | 97/360 (26.9)                     | 31512/154586 (20.4)          | 0.003   | 0.155 | 97/360 (26.9)                            | 388/1817 (21.4)            | 0.024   | 0.131  |
| eGFR <30, n (%)                              | 30/360 (8.3)                      | 5551/154586 (3.6)            | <0.001  | 0.201 | 30/360 (8.3)                             | 59/1817 (3.3)              | <0.001  | 0.219  |
| Urinalysis available, n(%)                   | 326 (81.1)                        | 131667 (75.7)                | 0.014   | 0.132 | 326 (81.1)                               | 1561 (77.7)                | 0.15    | 0.084  |
| Trace or greater, n (%)                      | 158/326 (48.5)                    | 28166/131667 (21.4)          | <0.001  | 0.592 | 158/326 (48.5)                           | 327/1561 (21.0)            | <0.001  | 0.604  |
| 1+ or greater, n (%)                         | 119/326 (36.5)                    | 16508/131667 (12.5)          | <0.001  | 0.58  | 119/326 (36.5)                           | 184/1561 (11.8)            | <0.001  | 0.603  |
| ESKD per USRDS, n (%)                        | 19 (4.7)                          | 1827 (1.1)                   | <0.001  | 0.187 | 19 (4.7)                                 | 18 (0.9)                   | <0.001  | 0.194  |
| ESKD per ICD code, n (%)                     | 23 (5.7)                          | 2668 (1.5)                   | <0.001  | 0.225 | 23 (5.7)                                 | 25 (1.2)                   | <0.001  | 0.246  |
| ESKD per USRDS or ICD code, n (%)            | 23 (5.7)                          | 2862 (1.7)                   | <0.001  | 0.218 | 23 (5.7)                                 | 27 (1.3)                   | <0.001  | 0.239  |
| ACR available, n (%)                         | 118 (29.4)                        | 48836 (28.1)                 | 0.607   | 0.028 | 118 (29.4)                               | 539 (26.8)                 | 0.329   | 0.056  |
| ACR >30, n (%)                               | 50/118 (42.4)                     | 11990/48836 (24.6)           | <0.001  | 0.385 | 50/118 (42.4)                            | 133/539 (24.7)             | <0.001  | 0.382  |
| ACR >300, n (%)                              | 20/118 (17.0)                     | 2692/48836 (5.5)             | <0.001  | 0.368 | 20/118 (17.0)                            | 29/538 (5.4)               | <0.001  | 0.374  |
| At least 1 phenotypic feature^               | 242 (60.2)                        | 76311 (38.7)                 | <0.001  | 0.44  | 242 (60.2)                               | 797 (39.7)                 | 1       | 0.419  |

\*Whole Exome Sequencing (WES): WES was performed by paired end 75bp reads on either an Illumina HiSeq2500 or NovaSeq. Coverage depth was sufficient to provide more than 20% coverage over 85% of the targeted bases in 96% of the VCR samples and 90% coverage for 99% of IDT samples. Alignments and variant calling were based on GRCh38 human genome reference sequence. We required AD\_ALT>3 and balance od AD\_ALT/AD\_REF ≥0.5.

**Supplemental Table 4. COL4A3 P/LP heterozygotes with an additional rare variant in COL4A3/4/5**

This table does not use USRDS data and Sample/Patient IDs are not known to anyone outside of the research group

| Study ID     | COL4A3 P/LP variant | Additional heterozygous rare variant(s) in COL4A3/4/5; ACMG classification per Varsome                                        | Phenotype                                                                                                            |
|--------------|---------------------|-------------------------------------------------------------------------------------------------------------------------------|----------------------------------------------------------------------------------------------------------------------|
| study_108043 | p.Gly30Arg          | COL4A4 p.Thr1474Met (LB; -1 points)                                                                                           | Stage 3a CKD. No dipstick hematuria, FSGS, bilateral sensorineural hearing loss, ESKD. Missing ACR data.             |
| study_111302 | c.468+1del          | COL4A4 p.Pro1587Arg (B; -8 points)                                                                                            | No CKD. No FSGS, bilateral sensorineural hearing loss, ESKD. Missing UA and ACR data.                                |
| Study_130305 | p.Gly818Arg         | COL4A4 p.Pro1587Arg (B; -8 points)                                                                                            | ESKD, eGFR<15, +dipstick hematuria, + severe albuminuria. No FSGS or bilateral sensorineural hearing loss.           |
| Study_130349 | p.Gly695Arg         | COL4A4 p.Pro1587Arg (B; -8 points)                                                                                            | No CKD. No FSGS, bilateral sensorineural hearing loss, ESKD. Missing UA and ACR data.                                |
| Study_143022 | p.Gly818Arg         | COL4A4 p.Pro1587Arg (B; -8 points)                                                                                            | Hematuria alone. No FSGS, bilateral sensorineural hearing loss, albuminuria, or ESKD.                                |
| Study_14567  | p.Gly695Arg         | <b>COL4A4 p.Gly774Arg (VUS; 5 points) in collagenous domain; COL4A4 p.Gly1465Asp (VUS; 3 points) in noncollagenous domain</b> | Hematuria + severe albuminuria, eGFR >60.                                                                            |
| Study_146959 | p.Gly115Arg         | COL4A3 p.Arg341His (VUS; 1 point)                                                                                             | No CKD. No dipstick hematuria, FSGS, bilateral sensorineural hearing loss, or ESKD. Missing ACR data.                |
| Study_149658 | p.Gly874AspfsTer9   | COL4A4 p.Arg877Gln (B; -12 points)                                                                                            | No CKD. No dipstick hematuria, FSGS, bilateral sensorineural hearing loss, or ESKD. Missing ACR data.                |
| Study_151405 | p.Gly818Arg         | COL4A4 p.Pro1587Arg (B; -8 points)                                                                                            | No CKD. No dipstick hematuria, FSGS, bilateral sensorineural hearing loss, or ESKD. Missing ACR data.                |
| Study_152777 | c.468+1G>T          | COL4A3 p.Val1560Ile (LB; -3 points)                                                                                           | Stage 3a CKD with severe albuminuria and dipstick hematuria. No FSGS, bilateral sensorineural hearing loss, or ESKD. |
| Study_15491  | p.Gly818Arg         | COL4A4 p.Pro1587Arg (B; -8 points)                                                                                            | No CKD. No dipstick hematuria, FSGS, bilateral sensorineural hearing loss, or ESKD. Missing ACR data                 |
| Study_158376 | p.Gly640Arg         | COL4A4 p.Gln1473Lys (VUS; 4 points)                                                                                           | No CKD. No FSGS, bilateral sensorineural hearing loss, or ESKD. Missing ACR and UA data.                             |
| Study_1600   | p.Gly818Arg         | COL4A4 p.Pro1587Arg (B; -8 points)                                                                                            | Stage 3a CKD. No FSGS, bilateral sensorineural hearing loss, or ESKD. Missing ACR and UA data.                       |
| Study_42724  | p.Gly695Arg         | COL4A4 p.Arg877Gln (B; -12 points)                                                                                            | Hematuria alone. eGFR>60, no albuminuria, FSGS, bilateral sensorineural hearing loss, or ESKD.                       |
| Study_46348  | c.3070+2T>C         | COL4A3 p.Leu1474Pro (VUS; 3 points)                                                                                           | ESKD + hematuria. No FSGS, bilateral sensorineural hearing loss. Missing ACR data                                    |
| Study_48927  | p.Gly818Arg         | COL4A4 p.Pro1587Arg (B; -8 points)                                                                                            | Hematuria alone. eGFR>60, no albuminuria, FSGS, bilateral sensorineural hearing loss, or ESKD.                       |
| Study_49318  | p.Gly336Cys         | COL4A4 p.Lys17Arg (B; -13 points)                                                                                             | ESKD + Hematuria + mild albuminuria. No FSGS, bilateral sensorineural hearing loss.                                  |
| Study_5112   | p.Gly818Arg         | COL4A4 p.Pro1587Arg (B; -8 points)                                                                                            | Hematuria only. eGFR>60, no FSGS, bilateral sensorineural hearing loss, or ESKD. Missing ACR data                    |
| Study_55019  | p.Gly695Arg         | COL4A4 p.Pro1587Arg (B; -8 points)                                                                                            | Hematuria alone. eGFR>60, no FSGS, bilateral sensorineural hearing loss, or ESKD. Missing ACR data                   |
| Study_61689  | p.Gly818Arg         | COL4A4 p.Pro1587Arg (B; -8 points)                                                                                            | No CKD. No FSGS, bilateral sensorineural hearing loss, or ESKD. Missing ACR and UA data.                             |
| Study_66784  | p.Gly1602AlafsTer13 | COL4A3 p.Asn1508Ser (VUS; 0 points)                                                                                           | Hematuria alone. eGFR>60, no FSGS, bilateral sensorineural hearing loss, or ESKD. Missing ACR data                   |
| Study_69681  | p.Gly818Arg         | COL4A4 p.Pro1587Arg (B; -8 points)                                                                                            | Hematuria alone. eGFR>60, no FSGS, bilateral sensorineural hearing loss, or ESKD. Missing ACR data                   |
| Study_77870  | p.Gly30Arg          | COL4A4 p.Thr1474Met (LB; -1 points)                                                                                           | Hematuria alone. eGFR>60, no albuminuria, FSGS, bilateral sensorineural hearing loss, or ESKD.                       |
| Study_80355  | p.Gly695Arg         | <b>COL4A3 p.Arg1661Cys (LP; 9 points)</b>                                                                                     | Missing eGFR, ACR, and UA data. No FSGS, bilateral sensorineural hearing loss, or ESKD.                              |
| Study_87695  | p.Gly874AspfsTer9   | COL4A3 p.Leu1474Pro (VUS; 3 points)                                                                                           | No CKD. No FSGS, bilateral sensorineural hearing loss, or ESKD. Missing ACR and UA data.                             |
| Study_89428  | p.Gly695Arg         | COL4A3 p.Leu1474Pro (VUS; 3 points)                                                                                           | ESKD + hematuria + bilateral sensorineural hearing loss. No FSGS. Missing ACR data.                                  |

Supplemental Table 5. Chart Review data of *COL4A3* AD Alport Syndrome-related Diagnosis and Management

| Variables n, (%)                                     | Prevalence of P/LP overall <i>COL4A3</i> variants and their subgroups |                   |                                                  |              |                                            |
|------------------------------------------------------|-----------------------------------------------------------------------|-------------------|--------------------------------------------------|--------------|--------------------------------------------|
|                                                      | Overall (n=402)                                                       | Gly695Arg (n=161) | Other collagenous domain glycine variants (n=47) | PTVs (n=119) | Other missense or inframe deletions (n=75) |
| Diagnosed with Alport Syndrome/TBMD/nephritis, n (%) | 4 (0.9)                                                               | 1 (0.6)           | 3 (0)                                            | 0 (0)        | 0 (0)                                      |
| Family history of AS or kidney disease, n (%)        | 7 (1.7)                                                               | 5 (3.1)           | 2 (4.1)                                          | 0 (0)        | 0 (0)                                      |
| Urology workup for hematuria, n (%)                  | 75 (18.6)                                                             | 50 (31.0)         | 17 (34.7)                                        | 4 (3.4)      | 4 (5.3)                                    |
| Genetic Testing for Alport Syndrome, n (%)           | 8 (2.0)                                                               | 5 (3.1)           | 2 (4.1)                                          | 0 (0)        | 1 (1.3)                                    |
| Kidney Biopsy performed, n (%)                       | 12 (3.0)                                                              | 9 (5.6)           | 3 (4.1)                                          | 0 (0)        | 0 (0)                                      |
| Taking ACEi or ARBs, n (%)                           | 101 (25.1)                                                            | 49 (30.4)         | 18 (36.7)                                        | 21 (17.6)    | 13 (17.3)                                  |

This table does not use USRDS data.

Supplemental Figure 1. KDIGO Risk Categories by COL4A3 P/LP Variant Group and Controls

# CKD Risk Categories

## Gly695Arg (n=122)

| Overall               | ACR, mg/g         |                   |                   | Total      |
|-----------------------|-------------------|-------------------|-------------------|------------|
|                       | <30               | 30-299            | 300+              |            |
| 60+ without hematuria | 17 (13.9%)        | 6 (4.9%)          | 2 (1.6%)          | 25 (20.5%) |
| 60+ with hematuria    | 40 (32.8%)        | 12 (9.8%)         | 6 (4.9%)          | 58 (47.5%) |
| 45-59                 | 4 (3.3%)          | 5 (4.1%)          | 1 (0.8%)          | 10 (8.2%)  |
| 30-44                 | 6 (4.9%)          | 4 (3.3%)          | 3 (2.5%)          | 13 (10.7%) |
| 15-29                 | 0                 | 1 (0.8%)          | 4 (3.3%)          | 5 (4.1%)   |
| <15                   | 2 (1.6%)          | 1 (0.8%)          | 8 (6.6%)          | 11 (9.0%)  |
| <b>Total</b>          | <b>69 (56.6%)</b> | <b>29 (23.8%)</b> | <b>24 (19.7%)</b> |            |

## PTVs (n=85)

| Overall               | ACR, mg/g         |                  |                   | Total      |
|-----------------------|-------------------|------------------|-------------------|------------|
|                       | <30               | 30-299           | 300+              |            |
| 60+ without hematuria | 42 (49.4%)        | 3 (3.5%)         | 3 (3.5%)          | 48 (56.5%) |
| 60+ with hematuria    | 8 (9.4%)          | 3 (3.5%)         | 5 (5.9%)          | 16 (18.8%) |
| 45-59                 | 9 (10.6%)         | 1 (1.2%)         | 2 (2.4%)          | 12 (14.1%) |
| 30-44                 | 3 (3.5%)          | 1 (1.2%)         | 0                 | 4 (4.7%)   |
| 15-29                 | 0                 | 1 (1.2%)         | 0                 | 1 (1.2%)   |
| <15                   | 0                 | 0                | 4 (4.7%)          | 4 (4.7%)   |
| <b>Total</b>          | <b>62 (72.9%)</b> | <b>9 (10.6%)</b> | <b>14 (16.5%)</b> |            |

|                                                                                                                             |                                                                                                         |
|-----------------------------------------------------------------------------------------------------------------------------|---------------------------------------------------------------------------------------------------------|
|  Low risk – no CKD                         |  High risk             |
|  Mildly increased risk - Hematuria alone |  Very high risk      |
|  Moderately increased risk               |  Extremely high risk |

KDIGO CKD Risk Categories: Hematuria only category had trace hematuria but eGFR>60 and ACR<30; moderately increased risk (eGFR>60 with ACR 30-300 or eGFR 45-59 with ACR<30); high risk (eGFR>60 with ACR >300, eGFR 45-59 with ACR 30-300, eGFR 30-44 with ACR<30); very high risk (eGFR 15-29 with ACR<30, eGFR 15-44 with ACR 30-300, eGFR 30-59 with ACR>300), extremely high risk (eGFR<15 or eGFR 15-29 with ACR>300, or ESKD by ICD code). If ACR data was unavailable, urinalysis data was used with dipstick 1+ twice classified as ACR 30-299 mg/g and dipstick 2+ twice or greater classified as ACR 300+ mg/g. This figure does not include any USRDS data.

## Other glycine variants (n=39)

| Overall               | ACR, mg/g         |                  |                  | Total      |
|-----------------------|-------------------|------------------|------------------|------------|
|                       | <30               | 30-299           | 300+             |            |
| 60+ without hematuria | 7 (18.0%)         | 0                | 0                | 7 (17.9%)  |
| 60+ with hematuria    | 15 (38.5%)        | 3 (7.7%)         | 1 (2.6%)         | 19 (48.7%) |
| 45-59                 | 3 (7.7%)          | 1 (2.6%)         | 1 (2.6%)         | 5 (12.8%)  |
| 30-44                 | 1 (2.6%)          | 1 (2.6%)         | 2 (5.1%)         | 4 (10.3%)  |
| 15-29                 | 0                 | 0                | 1 (2.6%)         | 1 (2.6%)   |
| <15                   | 0                 | 0                | 3 (7.7%)         | 3 (7.7%)   |
| <b>Total</b>          | <b>26 (66.7%)</b> | <b>5 (12.8%)</b> | <b>8 (20.5%)</b> |            |

## Other missense variants or inframe deletions (n=54)

| Overall               | ACR, mg/g         |                   |                  | Total      |
|-----------------------|-------------------|-------------------|------------------|------------|
|                       | <30               | 30-299            | 300+             |            |
| 60+ without hematuria | 28 (51.9%)        | 9 (16.7%)         | 2 (3.7%)         | 39 (72.2%) |
| 60+ with hematuria    | 3 (5.6%)          | 1 (1.9%)          | 1 (1.9%)         | 5 (9.3%)   |
| 45-59                 | 3 (5.6%)          | 0                 | 0                | 3 (5.6%)   |
| 30-44                 | 3 (5.6%)          | 1 (1.9%)          | 1 (1.9%)         | 5 (9.3%)   |
| 15-29                 | 0                 | 0                 | 0                | 0          |
| <15                   | 0                 | 0                 | 2 (3.7%)         | 2 (3.7%)   |
| <b>Total</b>          | <b>37 (68.5%)</b> | <b>11 (20.4%)</b> | <b>6 (11.1%)</b> |            |

## Controls (n=1438)

| Overall               | ACR, mg/g           |                    |                   | Total       |
|-----------------------|---------------------|--------------------|-------------------|-------------|
|                       | <30                 | 30-299             | 300+              |             |
| 60+ without hematuria | 752 (52.3%)         | 95 (6.6%)          | 42 (2.9%)         | 889 (61.8%) |
| 60+ with hematuria    | 154 (10.7%)         | 39 (2.7%)          | 27 (1.9%)         | 220 (15.3%) |
| 45-59                 | 146 (10.2%)         | 37 (2.6%)          | 15 (1.0%)         | 198 (13.8%) |
| 30-44                 | 47 (3.3%)           | 25 (1.7%)          | 7 (0.5%)          | 79 (5.5%)   |
| 15-29                 | 8 (0.6%)            | 10 (0.7%)          | 5 (0.4%)          | 23 (1.6%)   |
| <15                   | 11 (0.8%)           | 1 (0.1%)           | 17 (1.2%)         | 29 (2.0%)   |
| <b>Total</b>          | <b>1118 (77.7%)</b> | <b>207 (14.4%)</b> | <b>103 (7.9%)</b> |             |



Supplemental Figure 2. KDIGO Risk Categories in Glycine collagenous domain variants vs. controls, by age group

# CKD Risk Categories

All glycine collagenous domain variants – Age 30-65 (n=82)

| Overall               | ACR, mg/g  |            |            | Total      |
|-----------------------|------------|------------|------------|------------|
|                       | <30        | 30-299     | 300+       |            |
| 60+ without hematuria | 12 (14.6%) | 3 (3.7%)   | 1 (1.2%)   | 16 (19.5%) |
| 60+ with hematuria    | 43 (52.4%) | 9 (11.0%)  | 6 (7.3%)   | 58 (70.7%) |
| 45-59                 | 1 (1.2%)   | 1 (1.2%)   | 0          | 2 (2.4%)   |
| 30-44                 | 1 (1.2%)   | 1 (1.2%)   | 2 (2.4%)   | 4 (4.9%)   |
| 15-29                 | 0          | 0          | 0          | 0          |
| <15                   | 0          | 0          | 2 (2.4%)   | 2 (2.4%)   |
| <b>Total</b>          | 57 (69.5%) | 14 (17.1%) | 11 (13.4%) |            |

Controls – Age 30-65 (n=671)

| Overall               | ACR, mg/g   |            |           | Total       |
|-----------------------|-------------|------------|-----------|-------------|
|                       | <30         | 30-299     | 300+      |             |
| 60+ without hematuria | 433 (64.5%) | 48 (7.2%)  | 21 (3.1%) | 502 (74.8%) |
| 60+ with hematuria    | 93 (13.9%)  | 18 (2.7%)  | 14 (2.1%) | 125 (18.6%) |
| 45-59                 | 25 (3.7%)   | 3 (0.5%)   | 3 (0.5%)  | 31 (4.6%)   |
| 30-44                 | 3 (0.5%)    | 1 (0.2%)   | 1 (0.2%)  | 5 (0.7%)    |
| 15-29                 | 1 (0.2%)    | 0          | 0         | 1 (0.2%)    |
| <15                   | 3 (0.4%)    | 1 (0.1%)   | 3 (0.4%)  | 7 (1.0%)    |
| <b>Total</b>          | 558 (83.2%) | 71 (10.6%) | 42 (6.3%) |             |

All glycine collagenous domain variants 65+ (n=75)

| Overall               | ACR, mg/g  |            |            | Total      |
|-----------------------|------------|------------|------------|------------|
|                       | <30        | 30-299     | 300+       |            |
| 60+ without hematuria | 11 (14.7%) | 2 (2.7%)   | 1 (1.3%)   | 14 (5.3%)  |
| 60+ with hematuria    | 10 (13.3%) | 6 (8.0%)   | 1 (1.3%)   | 17 (22.7%) |
| 45-59                 | 6 (8.0%)   | 5 (6.7%)   | 2 (2.7%)   | 13 (17.3%) |
| 30-44                 | 6 (8.0%)   | 4 (5.3%)   | 3 (4.0%)   | 13 (17.3%) |
| 15-29                 | 0          | 1 (1.3%)   | 5 (6.7%)   | 6 (8.0%)   |
| <15                   | 2 (2.7%)   | 1 (1.3%)   | 9 (12.0%)  | 12 (16.0%) |
| <b>Total</b>          | 35 (46.7%) | 19 (25.3%) | 21 (28.0%) |            |

Controls – 65+ (n=698)

| Overall               | ACR, mg/g   |             |           | Total       |
|-----------------------|-------------|-------------|-----------|-------------|
|                       | <30         | 30-299      | 300+      |             |
| 60+ without hematuria | 274 (39.3%) | 36 (5.2%)   | 17 (2.4%) | 327 (46.8%) |
| 60+ with hematuria    | 58 (8.3%)   | 18 (2.6%)   | 10 (1.4%) | 86 (12.3%)  |
| 45-59                 | 121 (17.3%) | 34 (4.9%)   | 12 (1.7%) | 167 (23.9%) |
| 30-44                 | 44 (6.3%)   | 24 (3.4%)   | 6 (0.9%)  | 74 (10.6%)  |
| 15-29                 | 7 (1.0%)    | 10 (1.4%)   | 5 (0.7%)  | 22 (3.2%)   |
| <15                   | 8 (1.2%)    | 0           | 14 (2.0%) | 22 (3.2%)   |
| <b>Total</b>          | 512 (73.4%) | 122 (17.5%) | 64 (9.2%) |             |

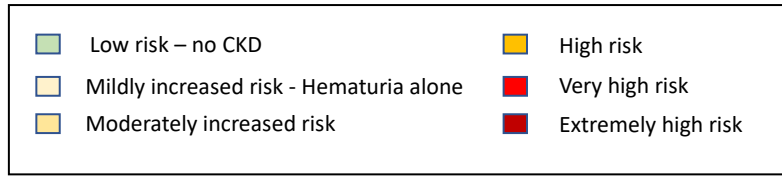

STROBE Statement—checklist of items that should be included in reports of observational studies

|                          | Item No. | Recommendation                                                                                                                                                                                                                                                                                                                                                                                                                                                         | Page No. | Relevant text from manuscript    |
|--------------------------|----------|------------------------------------------------------------------------------------------------------------------------------------------------------------------------------------------------------------------------------------------------------------------------------------------------------------------------------------------------------------------------------------------------------------------------------------------------------------------------|----------|----------------------------------|
| Title and abstract       | 1        | (a) Indicate the study’s design with a commonly used term in the title or the abstract                                                                                                                                                                                                                                                                                                                                                                                 | 2        | Health system-based cohort study |
|                          |          | (b) Provide in the abstract an informative and balanced summary of what was done and what was found                                                                                                                                                                                                                                                                                                                                                                    | 2        | See abstract                     |
| <b>Introduction</b>      |          |                                                                                                                                                                                                                                                                                                                                                                                                                                                                        |          |                                  |
| Background/rationale     | 2        | Explain the scientific background and rationale for the investigation being reported                                                                                                                                                                                                                                                                                                                                                                                   | 3, 4     | See introduction                 |
| Objectives               | 3        | State specific objectives, including any prespecified hypotheses                                                                                                                                                                                                                                                                                                                                                                                                       | 4        | See introduction                 |
| <b>Methods</b>           |          |                                                                                                                                                                                                                                                                                                                                                                                                                                                                        |          |                                  |
| Study design             | 4        | Present key elements of study design early in the paper                                                                                                                                                                                                                                                                                                                                                                                                                | 4, 5     | See Methods                      |
| Setting                  | 5        | Describe the setting, locations, and relevant dates, including periods of recruitment, exposure, follow-up, and data collection                                                                                                                                                                                                                                                                                                                                        | 4, 5, 6  | see Methods                      |
| Participants             | 6        | (a) <i>Cohort study</i> —Give the eligibility criteria, and the sources and methods of selection of participants. Describe methods of follow-up<br><i>Case-control study</i> —Give the eligibility criteria, and the sources and methods of case ascertainment and control selection. Give the rationale for the choice of cases and controls<br><i>Cross-sectional study</i> —Give the eligibility criteria, and the sources and methods of selection of participants | 4, 5, 6  | see Methods                      |
|                          |          | (b) <i>Cohort study</i> —For matched studies, give matching criteria and number of exposed and unexposed<br><i>Case-control study</i> —For matched studies, give matching criteria and the number of controls per case                                                                                                                                                                                                                                                 | 7        | Not applicable                   |
| Variables                | 7        | Clearly define all outcomes, exposures, predictors, potential confounders, and effect modifiers. Give diagnostic criteria, if applicable                                                                                                                                                                                                                                                                                                                               | 5, 6, 7  | see Methods                      |
| Data sources/measurement | 8*       | For each variable of interest, give sources of data and details of methods of assessment (measurement). Describe comparability of assessment methods if there is more than one group                                                                                                                                                                                                                                                                                   | 5, 6, 7  | see Methods                      |
| Bias                     | 9        | Describe any efforts to address potential sources of bias                                                                                                                                                                                                                                                                                                                                                                                                              | 7        | See methods                      |
| Study size               | 10       | Explain how the study size was arrived at                                                                                                                                                                                                                                                                                                                                                                                                                              | 4, 5, 7  | See methods and results          |

Continued on next page

|                                                                                                              |                                     |                                                                                                                                                                                                              |          |                                                                                             |
|--------------------------------------------------------------------------------------------------------------|-------------------------------------|--------------------------------------------------------------------------------------------------------------------------------------------------------------------------------------------------------------|----------|---------------------------------------------------------------------------------------------|
| Quantitative variables                                                                                       | 11                                  | Explain how quantitative variables were handled in the analyses. If applicable, describe which groupings were chosen and why                                                                                 | 5, 6, 7  | see statistical analysis                                                                    |
| Statistical methods                                                                                          | 12                                  | (a) Describe all statistical methods, including those used to control for confounding                                                                                                                        | 5, 6, 7  | See statistical analysis (logistic regression, chi-square tests, propensity-score matching) |
|                                                                                                              |                                     | (b) Describe any methods used to examine subgroups and interactions                                                                                                                                          | 7        |                                                                                             |
|                                                                                                              |                                     | (c) Explain how missing data were addressed                                                                                                                                                                  | 5, 6, 7  | Not applicable                                                                              |
|                                                                                                              |                                     | (d) <i>Cohort study</i> —If applicable, explain how loss to follow-up was addressed                                                                                                                          |          |                                                                                             |
|                                                                                                              |                                     | <i>Case-control study</i> —If applicable, explain how matching of cases and controls was addressed                                                                                                           |          |                                                                                             |
| <i>Cross-sectional study</i> —If applicable, describe analytical methods taking account of sampling strategy |                                     |                                                                                                                                                                                                              |          |                                                                                             |
|                                                                                                              | € Describe any sensitivity analyses |                                                                                                                                                                                                              |          | Not applicable                                                                              |
| <b>Results</b>                                                                                               |                                     |                                                                                                                                                                                                              |          |                                                                                             |
| Participants                                                                                                 | 13*                                 | (a) Report numbers of individuals at each stage of study—eg numbers potentially eligible, examined for eligibility, confirmed eligible, included in the study, completing follow-up, and analysed            | 7, 8, 9  | Included in the Results                                                                     |
|                                                                                                              |                                     | (b) Give reasons for non-participation at each stage                                                                                                                                                         |          | Not applicable                                                                              |
|                                                                                                              |                                     | (c) Consider use of a flow diagram                                                                                                                                                                           | 7        | Included in the Results (Figure 1)                                                          |
| Descriptive data                                                                                             | 14*                                 | (a) Give characteristics of study participants (eg demographic, clinical, social) and information on exposures and potential confounders                                                                     | 7, 8, 9  | Included in the Results Summarized in Tables 1, 2 and Supplemental Table 3                  |
|                                                                                                              |                                     | (b) Indicate number of participants with missing data for each variable of interest                                                                                                                          | 7        | Included in the Results (1 <i>COL4A3</i> P/LP heterozygote excluded due to missing data)    |
|                                                                                                              |                                     | (c) <i>Cohort study</i> —Summarise follow-up time (eg, average and total amount)                                                                                                                             | 8        | Included in the Results                                                                     |
| Outcome data                                                                                                 | 15*                                 | <i>Cohort study</i> —Report numbers of outcome events or summary measures over time                                                                                                                          | 8, 9, 10 | Included in the Results                                                                     |
|                                                                                                              |                                     | <i>Case-control study</i> —Report numbers in each exposure category, or summary measures of exposure                                                                                                         |          |                                                                                             |
|                                                                                                              |                                     | <i>Cross-sectional study</i> —Report numbers of outcome events or summary measures                                                                                                                           |          |                                                                                             |
| Main results                                                                                                 | 16                                  | (a) Give unadjusted estimates and, if applicable, confounder-adjusted estimates and their precision (eg, 95% confidence interval). Make clear which confounders were adjusted for and why they were included | 9        | Included in the Results                                                                     |
|                                                                                                              |                                     | (b) Report category boundaries when continuous variables were categorized                                                                                                                                    | 8, 9     | Included in the Results                                                                     |
|                                                                                                              |                                     | (c) If relevant, consider translating estimates of relative risk into absolute risk for a meaningful time period                                                                                             |          | Not applicable                                                                              |

Continued on next page

|                          |    |                                                                                                                                                                            |                   |                                                                |
|--------------------------|----|----------------------------------------------------------------------------------------------------------------------------------------------------------------------------|-------------------|----------------------------------------------------------------|
| Other analyses           | 17 | Report other analyses done—eg analyses of subgroups and interactions, and sensitivity analyses                                                                             | 8, 9              | Included in the Results<br>(Phenotype variability by subgroup) |
| <b>Discussion</b>        |    |                                                                                                                                                                            |                   |                                                                |
| Key results              | 18 | Summarise key results with reference to study objectives                                                                                                                   | 10                | Included in the Discussion                                     |
| Limitations              | 19 | Discuss limitations of the study, taking into account sources of potential bias or imprecision. Discuss both direction and magnitude of any potential bias                 | 13                | Included in the Discussion                                     |
| Interpretation           | 20 | Give a cautious overall interpretation of results considering objectives, limitations, multiplicity of analyses, results from similar studies, and other relevant evidence | 10, 11, 12,<br>13 | Included in the Discussion                                     |
|                          | 21 | Discuss the generalisability (external validity) of the study results                                                                                                      | 13                | Included in the Discussion                                     |
| <b>Other information</b> |    |                                                                                                                                                                            |                   |                                                                |
| Funding                  | 22 | Give the source of funding and the role of the funders for the present study and, if applicable, for the original study on which the present article is based              |                   | Not applicable                                                 |

\*Give information separately for cases and controls in case-control studies and, if applicable, for exposed and unexposed groups in cohort and cross-sectional studies.

**Note:** An Explanation and Elaboration article discusses each checklist item and gives methodological background and published examples of transparent reporting. The STROBE checklist is best used in conjunction with this article (freely available on the Web sites of PLoS Medicine at <http://www.plosmedicine.org/>, Annals of Internal Medicine at <http://www.annals.org/>, and Epidemiology at <http://www.epidem.com/>). Information on the STROBE Initiative is available at [www.strobe-statement.org](http://www.strobe-statement.org).
